# Supplementary material
Source: PubMed Central journal article supplement (PMC3666036)
Supplement: NIHMS461734-supplement-Table_S1.pdf [file NIHMS461734-supplement-Table_S1.pdf]

## SUPPLEMENTAL MATERIAL

**Supplemental Table 1. Determination of intra- and inter-assay variations in measured Hst-5 using 7 different saliva samples.** The assay variation in Hst-5 measurement by ELISA was determined by the mean coefficient of variation in absorbance (405 nm) among 7 replicates of individual samples in a single assay and in assays performed on 3 separate occasions.

| <b>Samples</b> | <b>Intra-Assay</b> (samples tested in triplicates) |                           |            | <b>Inter-Assay</b> (samples tested on three occasions) |                           |            |
|----------------|----------------------------------------------------|---------------------------|------------|--------------------------------------------------------|---------------------------|------------|
|                | <b>Mean (µg/ml)</b>                                | <b>Standard Deviation</b> | <b>CV%</b> | <b>Mean (µg/ml)</b>                                    | <b>Standard Deviation</b> | <b>CV%</b> |
| <b>1</b>       | 2.55                                               | 0.12                      | 4.61       | 2.88                                                   | 0.23                      | 8.51       |
| <b>2</b>       | 2.36                                               | 0.02                      | 1          | 2.38                                                   | 0.01                      | 0.6        |
| <b>3</b>       | 2.97                                               | 0.04                      | 1.5        | 2.94                                                   | 0.02                      | 0.764      |
| <b>4</b>       | 4.81                                               | 0.11                      | 2.31       | 4.86                                                   | 0.03                      | 0.67       |
| <b>5</b>       | 3.58                                               | 0.15                      | 4.26       | 3.2                                                    | 0.27                      | 7.85       |
| <b>6</b>       | 2.8                                                | 0.02                      | 0.77       | 2.7                                                    | 0.07                      | 2.58       |
| <b>7</b>       | 2.85                                               | 0.02                      | 0.67       | 2.83                                                   | 0.01                      | 0.49       |
