# Supplementary material
Source: PubMed Central journal article supplement (PMC3666036)
Supplement: NIHMS461734-supplement-Table_S2.pdf [file NIHMS461734-supplement-Table_S2.pdf]

**Supplemental Table 2. ELISA analytical spike and recovery of Hst-5 in 3 saliva samples.**

Samples were assayed by adding spike stock solution calculated to yield the intended 0, 1, 3 or 5µg/ml spike concentration. Values reported for spiked samples reflect subtraction of the endogenous (no-spike) value. Recoveries for spiked test samples were calculated by comparison to the measured recovery of spiked diluent control.

| <b>Sample</b>                     | <b>No Spike</b> | <b>Low Spike<br/>(1µg/ml)</b> | <b>Medium Spike<br/>(3µg/ml)</b> | <b>High Spike<br/>(5µg/ml)</b> |
|-----------------------------------|-----------------|-------------------------------|----------------------------------|--------------------------------|
| <b>1</b>                          | 7.21            | 8.15                          | 9.84                             | 13.17                          |
| <b>2</b>                          | 3.70            | 4.8                           | 6.84                             | 9.37                           |
| <b>3</b>                          | 2.37            | 3.22                          | 3.22                             | 7.71                           |
| <b>Mean Recovery<br/>(+/- SD)</b> | N.A             | 100%<br>(+/- 12.58%)          | 109%<br>(+/-10.7%)               | 92.3%<br>(+/-6%)               |
