# Supplementary material
Source: PubMed Central journal article supplement (PMC3666036)
Supplement: NIHMS461734-supplement-Table_S3.pdf [file NIHMS461734-supplement-Table_S3.pdf]

**Supplemental Table 3. Summary of spike and recovery results (Data from Table 2).**

| <b>Spike Level</b>                           | <b>Expected (<math>\mu\text{g/ml}</math>)</b> | <b>Observed (<math>\mu\text{g/ml}</math>)</b> | <b>Recovery %</b> |
|----------------------------------------------|-----------------------------------------------|-----------------------------------------------|-------------------|
| <b>Low (1<math>\mu\text{g/ml}</math>)</b>    | 5.43                                          | 5.39                                          | 95.7              |
| <b>Medium (3<math>\mu\text{g/ml}</math>)</b> | 7.43                                          | 6.63                                          | 89.2.             |
| <b>High (5<math>\mu\text{g/ml}</math>)</b>   | 9.43                                          | 10.1                                          | 113               |
