# Supplementary material
Source: PubMed Central journal article supplement (PMC3666036)
Supplement: NIHMS461734-supplement-Table_S4.pdf [file NIHMS461734-supplement-Table_S4.pdf]

**Supplemental Table 4. ELISA linearity-of-dilution results for determination of the effect of serial dilution of 3 saliva samples on measured Hst-5 concentration.** Dilutions were made in PBS and observed values were assessed relative to the assay standard curve produced by Hst-5 standards.

| <b>Sample</b> | <b>Dilution Factor</b> | <b>Observed (µg/ml)</b> | <b>Expected (µg/ml)</b> | <b>Recovery (%)</b> |
|---------------|------------------------|-------------------------|-------------------------|---------------------|
| <b>1</b>      | Neat                   | 6.052                   | 6.052                   | 100                 |
|               | 1:20                   | 7.413                   |                         | 122                 |
|               | 1:50                   | 7.21                    |                         | 119                 |
|               | 1:100                  | 6.24                    |                         | 103                 |
|               | 1:500                  | 6.684                   |                         | 110                 |
| <b>2</b>      | Neat                   | 4.583                   | 4.583                   | 100                 |
|               | 1:20                   | 4.899                   |                         | 107                 |
|               | 1:50                   | 4.641                   |                         | 101                 |
|               | 1:100                  | 4.804                   |                         | 105                 |
|               | 1:500                  | 3.98                    |                         | 87                  |
| <b>3</b>      | Neat                   | 2.396                   | 2.396                   | 100                 |
|               | 1:20                   | 2.779                   |                         | 116                 |
|               | 1:50                   | 2.548                   |                         | 100                 |
|               | 1:100                  | 2.548                   |                         | 100                 |
|               | 1:500                  | 2.405                   |                         | 100                 |
