# Supplementary material
Source: PubMed Central journal article supplement (PMC3666036)
Supplement: NIHMS461734-supplement-Table_S5.pdf [file NIHMS461734-supplement-Table_S5.pdf]

**Supplemental Table 5. Characterization of HIV+ subjects**

| <b>Subject</b> | <b>Age</b> | <b>Sex</b> | <b>HIV+<br/>(years)</b> | <b>CD4</b> | <b>HIV<br/>therapy</b> | <b>CFUs<br/>(cells/ml)</b> | <b>Hst-5<br/>(µg/ml)</b> |
|----------------|------------|------------|-------------------------|------------|------------------------|----------------------------|--------------------------|
| 1              | 56         | M          | 14                      | 566        | Y                      | 50                         | 1.86                     |
| 2              | 61         | M          | 14                      | 442        | Y                      | 5x10 <sup>2</sup>          | 0.83                     |
| 3              | 56         | M          | 7                       | 184        | N                      | 5.6x10 <sup>3</sup>        | 1.33                     |
| 4              | 46         | M          | 3                       | 382        | Y                      | 5.6x10 <sup>3</sup>        | 0.66                     |
| 5              | 65         | M          | 16                      | 845        | Y                      | 9.75x10 <sup>3</sup>       | 2.82                     |
| 6              | 61         | M          | 6                       | 170        | Y                      | 2.5x10 <sup>2</sup>        | 1.04                     |
| 7              | 57         | M          | 15                      | 200        | Y                      | 1x10 <sup>2</sup>          | 2.26                     |
| 8              | 72         | M          | 1                       | 185        | Y                      | 1x10 <sup>6</sup>          | 3.61                     |
| 9              | 30         | F          | 2                       | 445        | Y                      | 1x10 <sup>2</sup>          | 3.07                     |
| 10             | 27         | M          | 8                       | 416        | Y                      | 1x10 <sup>2</sup>          | 2.79                     |
| 11             | 54         | M          | 26                      | 320        | Y                      | 1x10 <sup>6</sup>          | 2.62                     |
| 12             | 25         | M          | 29                      | 345        | Y                      | 4x10 <sup>2</sup>          | 1.37                     |
| 13             | 41         | M          | 7                       | 525        | N                      | 1.125x10 <sup>4</sup>      | 1.28                     |
| 14             | 46         | M          | 25                      | 900        | Y                      | 2x10 <sup>2</sup>          | 2.54                     |
| 15             | 46         | M          | 22                      | 707        | Y                      | 1.5x10 <sup>3</sup>        | 4.29                     |
| 16             | 59         | M          | 18                      | 471        | Y                      | 1.25x10 <sup>3</sup>       | 1.87                     |
| 17             | 31         | M          | 3                       | 254        | N                      | Neg                        | 1.32                     |
| 18             | 48         | M          | 26                      | 1140       | Y                      | Neg                        | 1.78                     |
| 19             | 23         | M          | 2                       | 817        | Y                      | Neg                        | 2.47                     |
| 20             | 22         | M          | 1                       | 268        | N                      | Neg                        | 1.47                     |
| 21             | 58         | M          | 2                       | 98         | N                      | Neg                        | 1.1                      |
| 22             | 57         | M          | 17                      | 148        | Y                      | Neg                        | 0.89                     |
| 23             | 53         | F          | unknown                 | 405        | Y                      | Neg                        | 3.78                     |
| 24             | 56         | M          | 13                      | 458        | N                      | Neg                        | 0.77                     |
| 25             | 25         | M          | 2                       | 368        | Y                      | Neg                        | 2.28                     |
| 26             | 49         | M          | 11                      | 113        | Y                      | Neg                        | 2.32                     |
| 27             | 50         | M          | 10                      | 832        | Y                      | Neg                        | 1.89                     |

|           |    |   |    |     |   |     |      |
|-----------|----|---|----|-----|---|-----|------|
| <b>28</b> | 51 | M | 13 | 400 | Y | Neg | 2.4  |
| <b>29</b> | 52 | M | 16 | 461 | Y | Neg | 3.64 |
| <b>30</b> | 49 | M | 21 | 549 | Y | Neg | 2.19 |
| <b>31</b> | 49 | M | 19 | 568 | Y | Neg | 2.03 |
| <b>32</b> | 56 | M | 16 | 828 | N | Neg | 1.95 |
