# Supplementary material
Source: PubMed Central journal article supplement (PMC3666036)
Supplement: NIHMS461734-supplement-Table_S6.pdf [file NIHMS461734-supplement-Table_S6.pdf]

**Table 6. Characterization of HIV- subjects**

| <b>Subject</b> | <b>Age</b> | <b>Sex</b> | <b>CFUs<br/>(cells/ml)</b> | <b>Hst-5<br/>(µg/ml)</b> |
|----------------|------------|------------|----------------------------|--------------------------|
| <b>1</b>       | 50         | F          | 2.5x10 <sup>3</sup>        | 3.94                     |
| <b>2</b>       | 50         | M          | 50                         | 4.12                     |
| <b>3</b>       | 82         | M          | 7x10 <sup>3</sup>          | 2.42                     |
| <b>4</b>       | 72         | M          | 1x10 <sup>6</sup>          | 2.46                     |
| <b>5</b>       | 40         | M          | 1x10 <sup>2</sup>          | 3.88                     |
| <b>6</b>       | 30         | F          | Neg                        | 13.01                    |
| <b>7</b>       | 54         | F          | Neg                        | 12.98                    |
| <b>8</b>       | 31         | M          | Neg                        | 10.54                    |
| <b>9</b>       | 38         | M          | Neg                        | 5.72                     |
| <b>10</b>      | 47         | F          | Neg                        | 4.36                     |
| <b>11</b>      | 42         | M          | Neg                        | 9.24                     |
| <b>12</b>      | 35         | F          | Neg                        | 6.59                     |
| <b>13</b>      | 35         | F          | Neg                        | 4.2                      |
| <b>14</b>      | 53         | F          | Neg                        | 5.23                     |
| <b>15</b>      | 36         | M          | Neg                        | 4.56                     |
| <b>16</b>      | 49         | F          | Neg                        | 4.22                     |
| <b>17</b>      | 37         | F          | Neg                        | 6.8                      |
| <b>18</b>      | 39         | M          | Neg                        | 9.92                     |
| <b>19</b>      | 28         | F          | Neg                        | 6.96                     |
| <b>20</b>      | 30         | M          | Neg                        | 11.45                    |
| <b>21</b>      | 31         | F          | Neg                        | 6.27                     |
| <b>22</b>      | 40         | M          | Neg                        | 7.44                     |
| <b>23</b>      | 30         | M          | Neg                        | 4.82                     |
| <b>24</b>      | 34         | F          | Neg                        | 9.06                     |
| <b>25</b>      | 48         | M          | Neg                        | 4.82                     |
| <b>26</b>      | 84         | M          | Neg                        | 3.3                      |
| <b>27</b>      | 45         | F          | Neg                        | 3.64                     |

|           |    |   |     |       |
|-----------|----|---|-----|-------|
| <b>28</b> | 57 | F | Neg | 3.97  |
| <b>29</b> | 59 | M | Neg | 5.71  |
| <b>30</b> | 47 | F | Neg | 10.08 |
| <b>31</b> | 31 | M | Neg | 6.12  |
| <b>32</b> | 65 | M | Neg | 9.52  |
